# Supplementary material for: Construction of a Keggin heteropolyacid/Ni-MOF catalyst for esterification of fatty acids
Source: Royal Society of Chemistry journal article supplement (doi:10.1039/d1ra06023f), 2021-01-01
Supplement: d1ra06023f1.pdf [file d1ra06023f1.pdf]

## Electronic Supplementary Information

### Construction of Keggin heteropolyacid/Ni-MOF catalyst for esterification of fatty acids

Qiuyun Zhang <sup>a, b, c\*</sup>, Qizhi Luo <sup>a</sup>, Yaping Wu <sup>a</sup>, Rongfei Yu <sup>a</sup>, Jingsong Cheng <sup>a</sup>, Yutao Zhang <sup>a, b, c\*</sup>

*a* School of Chemistry and Chemical Engineering, Anshun University, Anshun 561000, Guizhou, China

*b* College Rural Revitalization Research Center of Guizhou, Anshun, 561000, Guizhou, China

*c* Engineering Technology Center of Control and Remediation of Soil Contamination of Guizhou Science and Technology Department, Anshun University, Anshun, 561000, Guizhou, China

\* Correspondence: sci\_qyzhang@126.com (Qiuyun Zhang); zyt0516@126.com (Yutao Zhang).

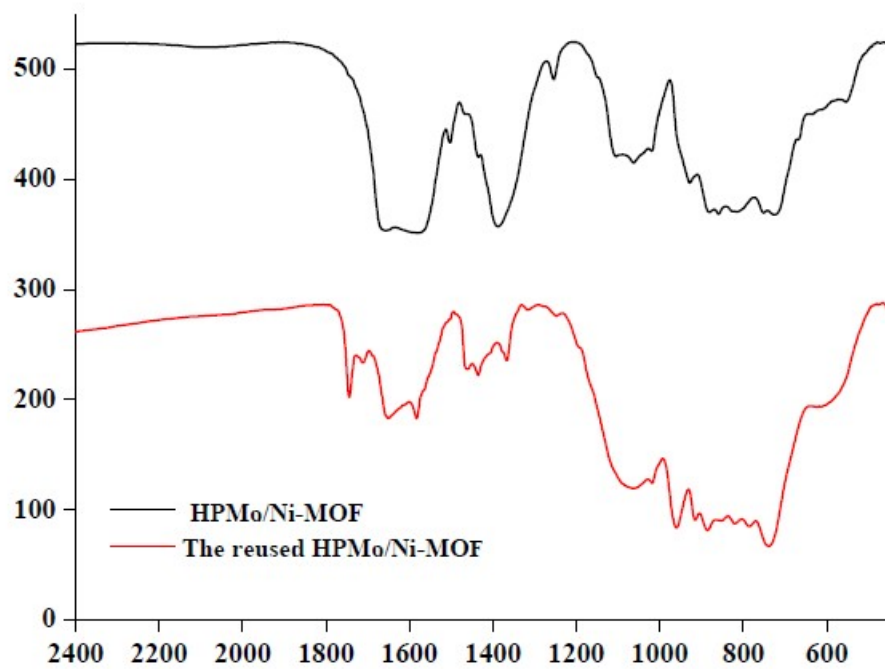

**Figure S1.** FTIR spectra of the fresh HPMo/Ni-MOF catalyst and used after the tenth runs.
